# Supplementary material for: Metal-loaded zeolites in ammonia decomposition catalysis
Source: Royal Society of Chemistry journal article supplement (doi:10.1039/d2fd00175f), 2023-01-01
Supplement: d2fd00175f1.pdf [file d2fd00175f1.pdf]

# Supplementary Information

## Metal-Loaded Zeolites in Ammonia Decomposition Catalysis

Kwan Chee Leung<sup>†</sup>, Ephraem Tan<sup>†</sup>, Guangchao Li, Bryan Ng, Konstantin Lebedev  
and Shik Chi Edman Tsang\*

*The Wolfson Catalysis Centre, Department of Chemistry, University of Oxford, Oxford, OX1 3QR, UK;*

*<sup>†</sup> co-first author, email: edman.tsang@chem.ox.ac.uk*

### XAS

#### EXAFS - Experimental

EXAFS data analysis was conducted using IFEFFIT with Horae packages (Athena and Artemis). Spectra were calibrated with Ru foil as a reference to avoid energy shifts of the samples. The amplitude reducing parameter was obtained from EXAFS data analysis of the Ru foil, which was used as a fixed input parameter in the data fitting to allow the refinement in the CN of the absorption element.

| Sample        | Scattering Paths | CN                 | Radial distance / Å | D-W factor / 10 <sup>-3</sup> | E <sub>0</sub>      | R-factor | k range | R range |
|---------------|------------------|--------------------|---------------------|-------------------------------|---------------------|----------|---------|---------|
| Ru-Y 6.4%     | Ru-Ru            | 9.68 ± 1.19        | 2.675 ± 0.005       | 3.8 ± 0.7                     | -5.42 ± 1.05        | 1.72     | 2-13    | 1-3     |
| Ru-Y (N) 6.4% | Ru-O             | <b>4.18 ± 1.70</b> | <b>1.99 ± 0.03</b>  | <b>8.3 ± 5.0</b>              | <b>-2.00 ± 3.87</b> | 1.62     | 2-13    | 1-3     |
|               | Ru-Ru            | <b>3.90 ± 1.08</b> | <b>2.67 ± 0.01</b>  | <b>6.2 ± 1.7</b>              | <b>-4.06 ± 1.77</b> |          |         |         |
| Ru-Y 3.3%     | Ru-O             | 3.10 ± 4.30        | 1.96 ± 0.09         | 10.4 ± 17.2                   | -7.65 ± 13.52       | 1.48     | 2-13    | 1-3     |
|               | Ru-Ru            | 7.01 ± 1.53        | 2.678 ± 0.008       | 4.2 ± 1.2                     | -5.52 ± 1.58        |          |         |         |
| Ru-Y (N) 3.3% | Ru-O             | <b>4.65 ± 1.58</b> | <b>2.00 ± 0.02</b>  | <b>8.1 ± 4.2</b>              | <b>-2.80 ± 3.34</b> | 2.59     | 2-13    | 1-3     |
|               | Ru-Ru            | <b>3.35 ± 1.20</b> | <b>2.60 ± 0.02</b>  | <b>7.8 ± 2.5</b>              | <b>-3.22 ± 2.17</b> |          |         |         |

Table S.1: Complete EXAFS fitting parameters for Ru-Y catalyst series.

#### EXAFS - DFT simulations

To ensure consistency, all EXAFS fittings were performed with the same parameters. The R range of 1-4 and k range of 4-12 was considered, with a Hanning k-window at  $\Delta k = 1$  and  $dR = 0$ . Fit included all the scattering paths shorter than 4 Å present in the geometry-optimised structure. The background function was fitted without

phase correction. To limit the number of optimised variables, all paths included in the fitting model have been optimised with the same passive amplitude reduction factor (S02) and energy shift parameter ( $\Delta E_0$ ). k1, k2, and k3-weighted data are all fitted for reliability, using the Artemis software from the Demeter package.

#### XANES - DFT simulations

Experimental Ru K-edge XANES for left and right and spectra were calculated and FDMNES codes for Ru<sub>6</sub>N<sub>6</sub> clusters. The Green's function multiple-scattering method was used as implemented in the fdmnes code. Calculated spectra in the main panel are shifted vertically for clarity. The XANES region where the largest size effect is observed is zoomed in in the inset.

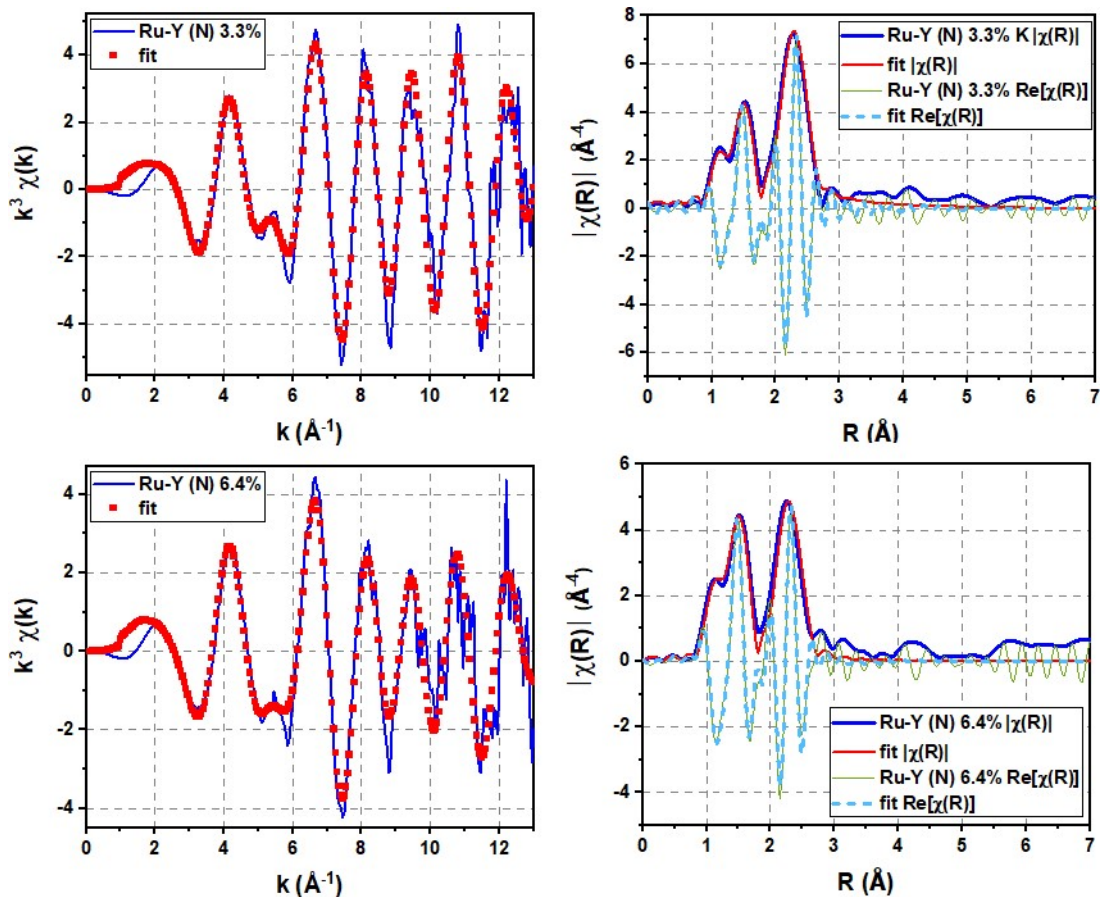

**Figure S.1:** EXAFS fitting curves of Ru-Y (N) 6.4% and Ru-Y (N) 3.3% in R-space and k-space.

| Model                          | 1 <sup>st</sup> shell | CN | $R_{fit}$ (Ru-N) <sub>i</sub> [Å] | $\sigma$ [Å]  | $\Delta R_{fit}$ (N) | 2 <sup>nd</sup> shell | CN | $R_{fit}$ [Å] | $\sigma$ [Å]  | $\Delta R_{fit}$ (Ru) | R-value |
|--------------------------------|-----------------------|----|-----------------------------------|---------------|----------------------|-----------------------|----|---------------|---------------|-----------------------|---------|
| Ru <sub>6</sub> N <sub>6</sub> | Ru-N                  | 1  | 1.93                              | 0.002 ± 0.002 | 0.176 ± 0.017        | Ru-Ru                 | 2  | 2.33          | 0.005 ± 0.001 | -0.113 ± 0.004        | 1.24%   |
|                                |                       |    |                                   |               |                      |                       | 1  | 2.7           |               |                       |         |
|                                |                       |    |                                   |               |                      |                       | 2  | 3.566         |               |                       |         |
| Model                          | 1 <sup>st</sup> shell | CN | $R_{fit}$ (Ru-N) <sub>i</sub> [Å] | $\sigma$ [Å]  | $\Delta R_{fit}$ (N) | 2 <sup>nd</sup> shell | CN | $R_{fit}$ [Å] | $\sigma$ [Å]  | $\Delta R_{fit}$ (Ru) | R-value |
| Ru <sub>6</sub> N <sub>6</sub> | Ru-N                  | 1  | 1.93                              | 0.006 ± 0.005 | 0.145 ± 0.031        | Ru-Ru                 | 2  | 2.33          | 0.005 ± 0.001 | 0.113 ± 0.004         | 2.05%   |
|                                |                       |    |                                   |               |                      |                       | 1  | 2.7           |               |                       |         |
|                                |                       |    |                                   |               |                      |                       | 2  | 3.566         |               |                       |         |

**Table S.2:** Complete DFT calculation parameters for Ru<sub>6</sub>N<sub>6</sub> fitting to the EXAFS spectra of Ru-Y (N) 3.3% (top) and Ru-Y (N) 6.4% (bottom).  $\sigma$  is the Debye-Waller factor;  $R_{fit}$  is the fitted bond length;  $\Delta R_{fit}$  is the deviation of the fitted bond length.  $k_{wt} = 1-3$ ,  $k$ -range = 4-12.

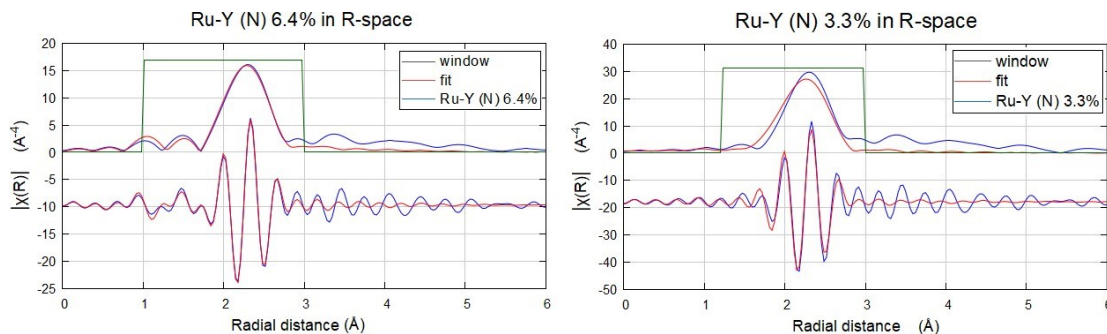

**Figure S.2:** Fourier-transformed magnitudes of Ru K-edge EXAFS spectra of Ru-Y (N) 6.4% and Ru-Y (N) 3.3%. The best simulated fitting results using this thesis' proposed Ru<sub>6</sub>N<sub>6</sub> cluster model is shown in red.
